# Supplementary material for: Enhanced photocatalytic H2evolution over noble-metal-free NiS cocatalyst modified CdS nanorods/g-C3N4heterojunctions
Source: Royal Society of Chemistry journal article supplement (doi:10.1039/c5ta04573h), 2015-01-01
Supplement: c5ta04573h1.pdf [file c5ta04573h1.pdf]

## Electronic Supplementary Information

### Enhanced photocatalytic H<sub>2</sub> evolution over noble-metal-free NiS cocatalyst modified CdS nanorods/g-C<sub>3</sub>N<sub>4</sub> heterojunctions

Jielin Yuan, Jiuqing Wen, Yongming Zhong, Xin Li,\* Yueping Fang,\* Shengsen Zhang and Wei Liu\*

College of Materials and Energy, South China Agricultural University, Guangzhou 510642, China.

\*Corresponding author . E-mail: Xinliscou@yahoo.com (X. Li), ypfang@scau.edu.cn (Y. Fang), wlscau@163.com (W. Liu)

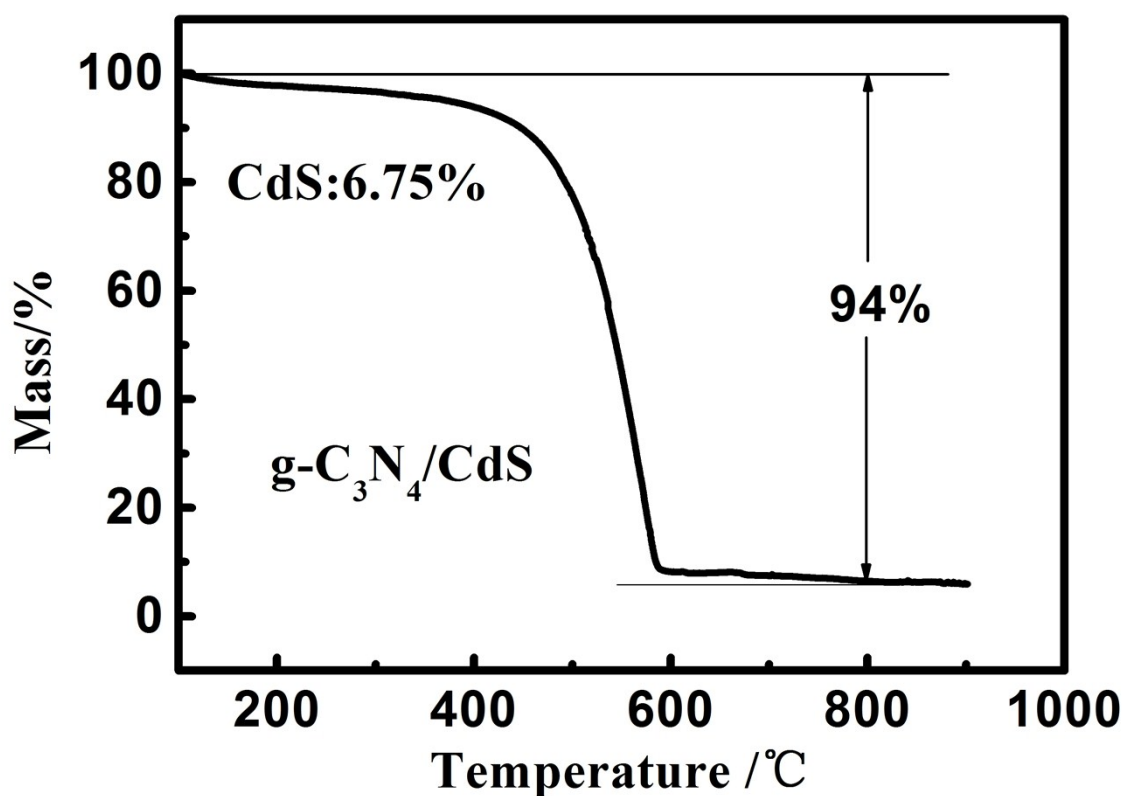

Fig. S1 Thermal gravimetric analysis (TGA) curves of the g-C<sub>3</sub>N<sub>4</sub>-CdS.
